# Supplementary material for: Simultaneous differential detection of H5, H7 and H9 subtypes of avian influenza viruses by a triplex fluorescence loop-mediated isothermal amplification assay
Source: Frontiers journal article supplement (doi:10.3389/fvets.2024.1419312), 2024-07-02
Supplement: Image_1.pdf [file Image_1.pdf]

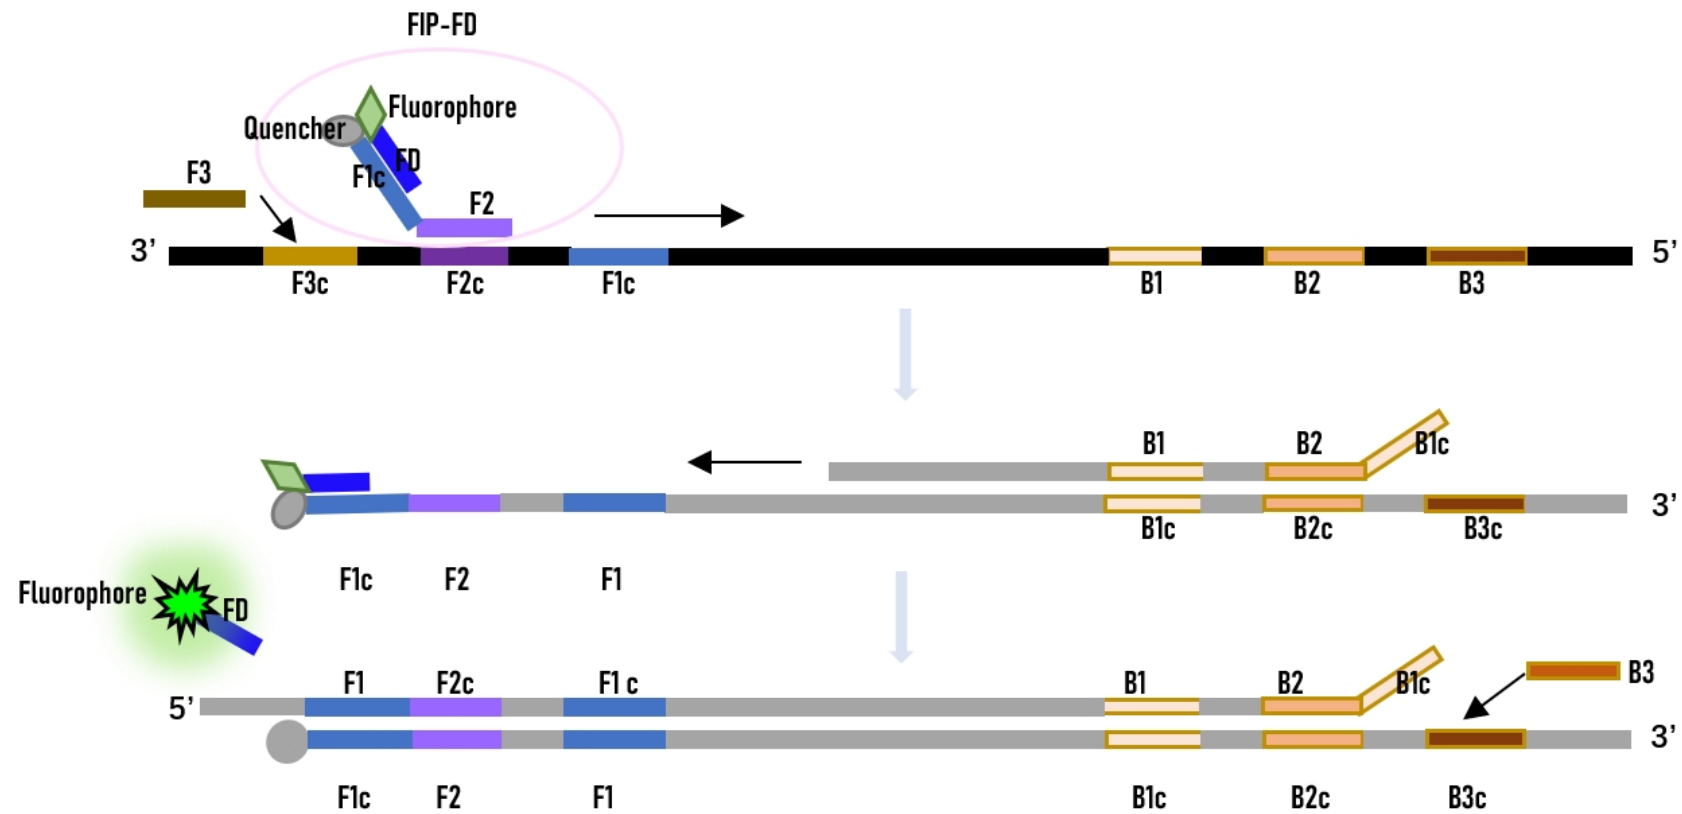

Supplementary Figure S1. Schematic diagram of the TLAMP mechanism.

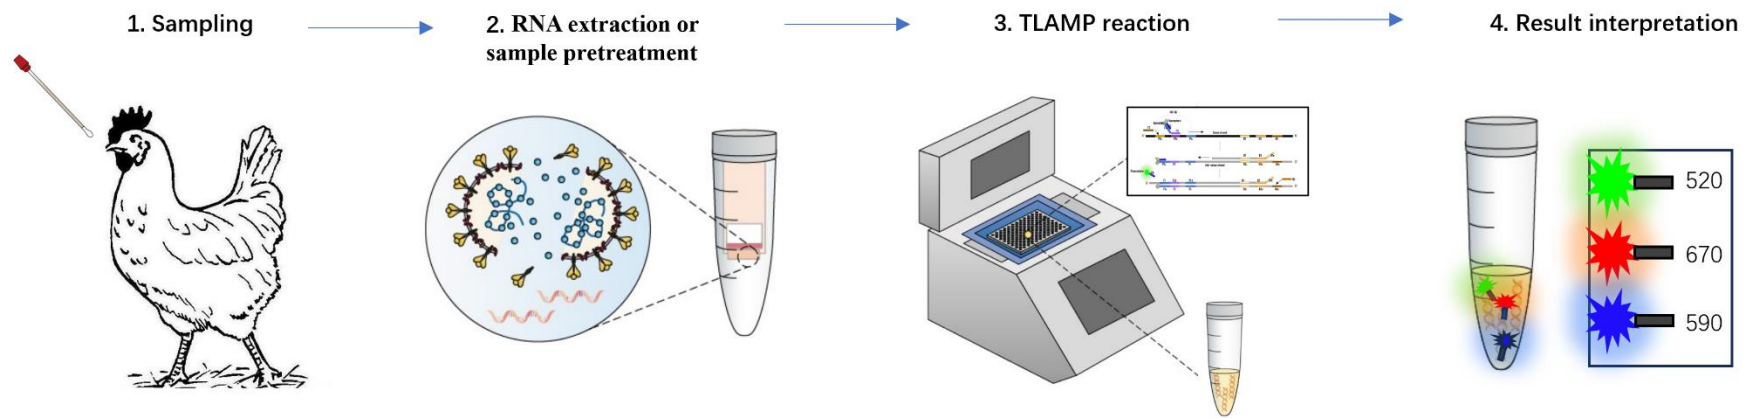

Supplementary Figure S2. Flow chart of the TLAMP assay.
